# Supplementary material
Source: Springer Nature journal article supplement (https://www.springermedizin.de/resource/supplementary/12933_2014_833_MOESM1_ESM.pdf/9539346)

## Longitudinal Strain, SR

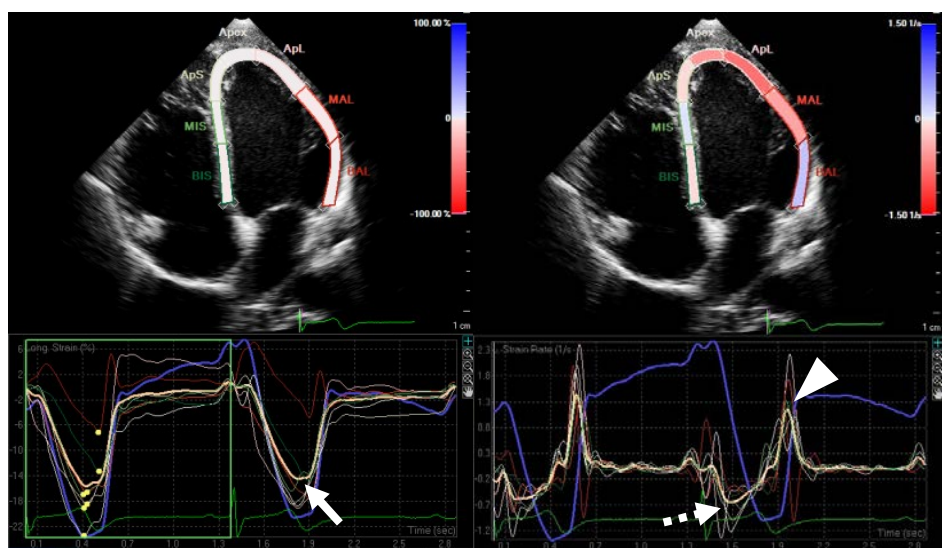

## Circumferential Strain, SR

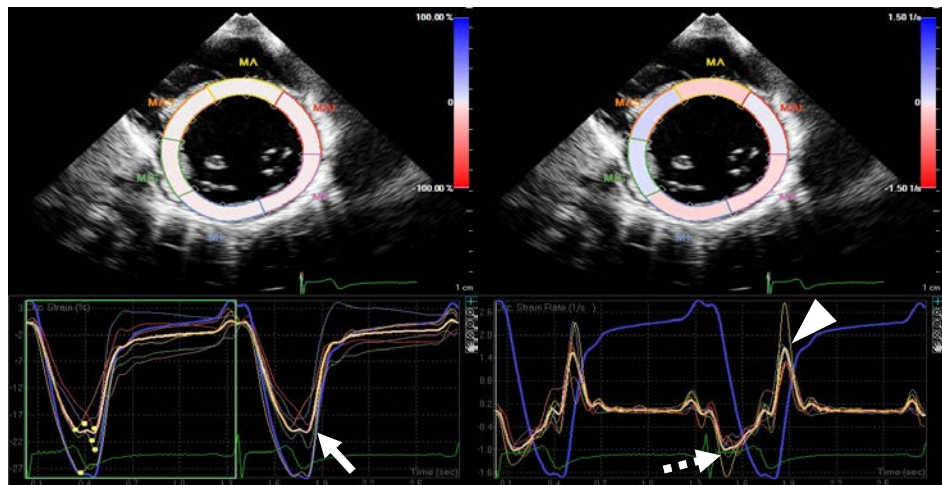

Supplement: MOESM1 [file 9539346]
